# Supplementary material
Source: publisher site journal article supplement (https://www.dovepress.com/article/357582)
Supplement: Supplementary file 1 [file get_supplementary_file.php]

**Supplementary Table 1** Baseline characteristics of included and excluded patients.

| **Characteristics** | **Included patients (n=204)** | **Excluded patients (n=409)** | **P value** |
| --- | --- | --- | --- |
| Age, years | 71.65±5.89 | 59.67±5.06 | <0.001 |
| Gender, female | 81(39.7) | 177(43.3) | 0.399 |
| Marriage status | 183(89.7) | 377(92.2) | 0.305 |
| Education level |  |  | 0.866 |
| <6 years | 12(5.9) | 26(6.4) |  |
| 6-12 years | 133(65.2) | 273(66.7) |  |
| >12 years | 59(28.9) | 110(26.9) |  |
| Smoking history | 95(46.6) | 175(42.8) | 0.374 |
| Alcohol intake | 78(38.2) | 183(44.7) | 0.125 |
| Medical history |  |  |  |
| Hypertension | 177(86.8) | 368(90.0) | 0.233 |
| Diabetes | 84(41.2) | 151(36.9) | 0.307 |
| Stroke | 31(15.2) | 70(17.1) | 0.546 |
| CHD | 65(31.9) | 129(31.5) | 0.936 |
| MoCA<26 | 130(63.7) | 241(58.9) | 0.252 |
| Dialysis vintage, mo. | 59.00(21.00, 99.50) | 57.00(28.00, 102.00) | 0.687 |
| Single-pool Kt/V | 1.29±0.17 | 1.28±0.18 | 0.598 |
| BMI, kg/m2 | 23.95±4.28 | 23.52±3.97 | 0.222 |
| Hb, g/L | 110.24±13.33 | 111.58±14.17 | 0.262 |
| Alb, g/L | 38.67±3.35 | 39.71±3.33 | 0.213 |
| TC, mmol/L | 4.22±1.39 | 4.26±1.22 | 0.693 |
| TG, mmol/L | 1.99±1.22 | 2.14±1.56 | 0.222 |
| Calcium, mmol/L | 2.23±0.25 | 2.25±0.24 | 0.317 |
| Phosphate, mmol/L | 1.73±0.72 | 1.71±0.61 | 0.675 |
| iPTH, pg/mL | 268.47±182.09 | 280.56±255.88 | 0.513 |
| CRP, mg/L | 5.05±6.89 | 5.98±12.07 | 0.308 |
| EPO dosage, u/W | 7500(6000,9000) | 7500(6000,9000) | 0.987 |

**Abbreviation：**CHD, coronary heart disease; MoCA： Montreal Cognitive Assessment; Kt/V, an indicator for evaluating dialysis adequacy; BMI, body mass index; Hb, hemoglobin; ALB, albumin; TC, total cholesterol; TG, triglyceride; iPTH, intact parathyroid hormone; CRP, C-reactive protein; EPO, erythropoietin.
